# Supplementary figures and images for: Phytochemical analysis of Panax species: a review
Source: PubMed Central journal article supplement — J Ginseng Res. 2020 Jan 14;45(1):1–21. doi: 10.1016/j.jgr.2019.12.009 (PMC7790905; doi:10.1016/j.jgr.2019.12.009), 2020-01-14

# Phytochemical analysis of *Panax* species: A review

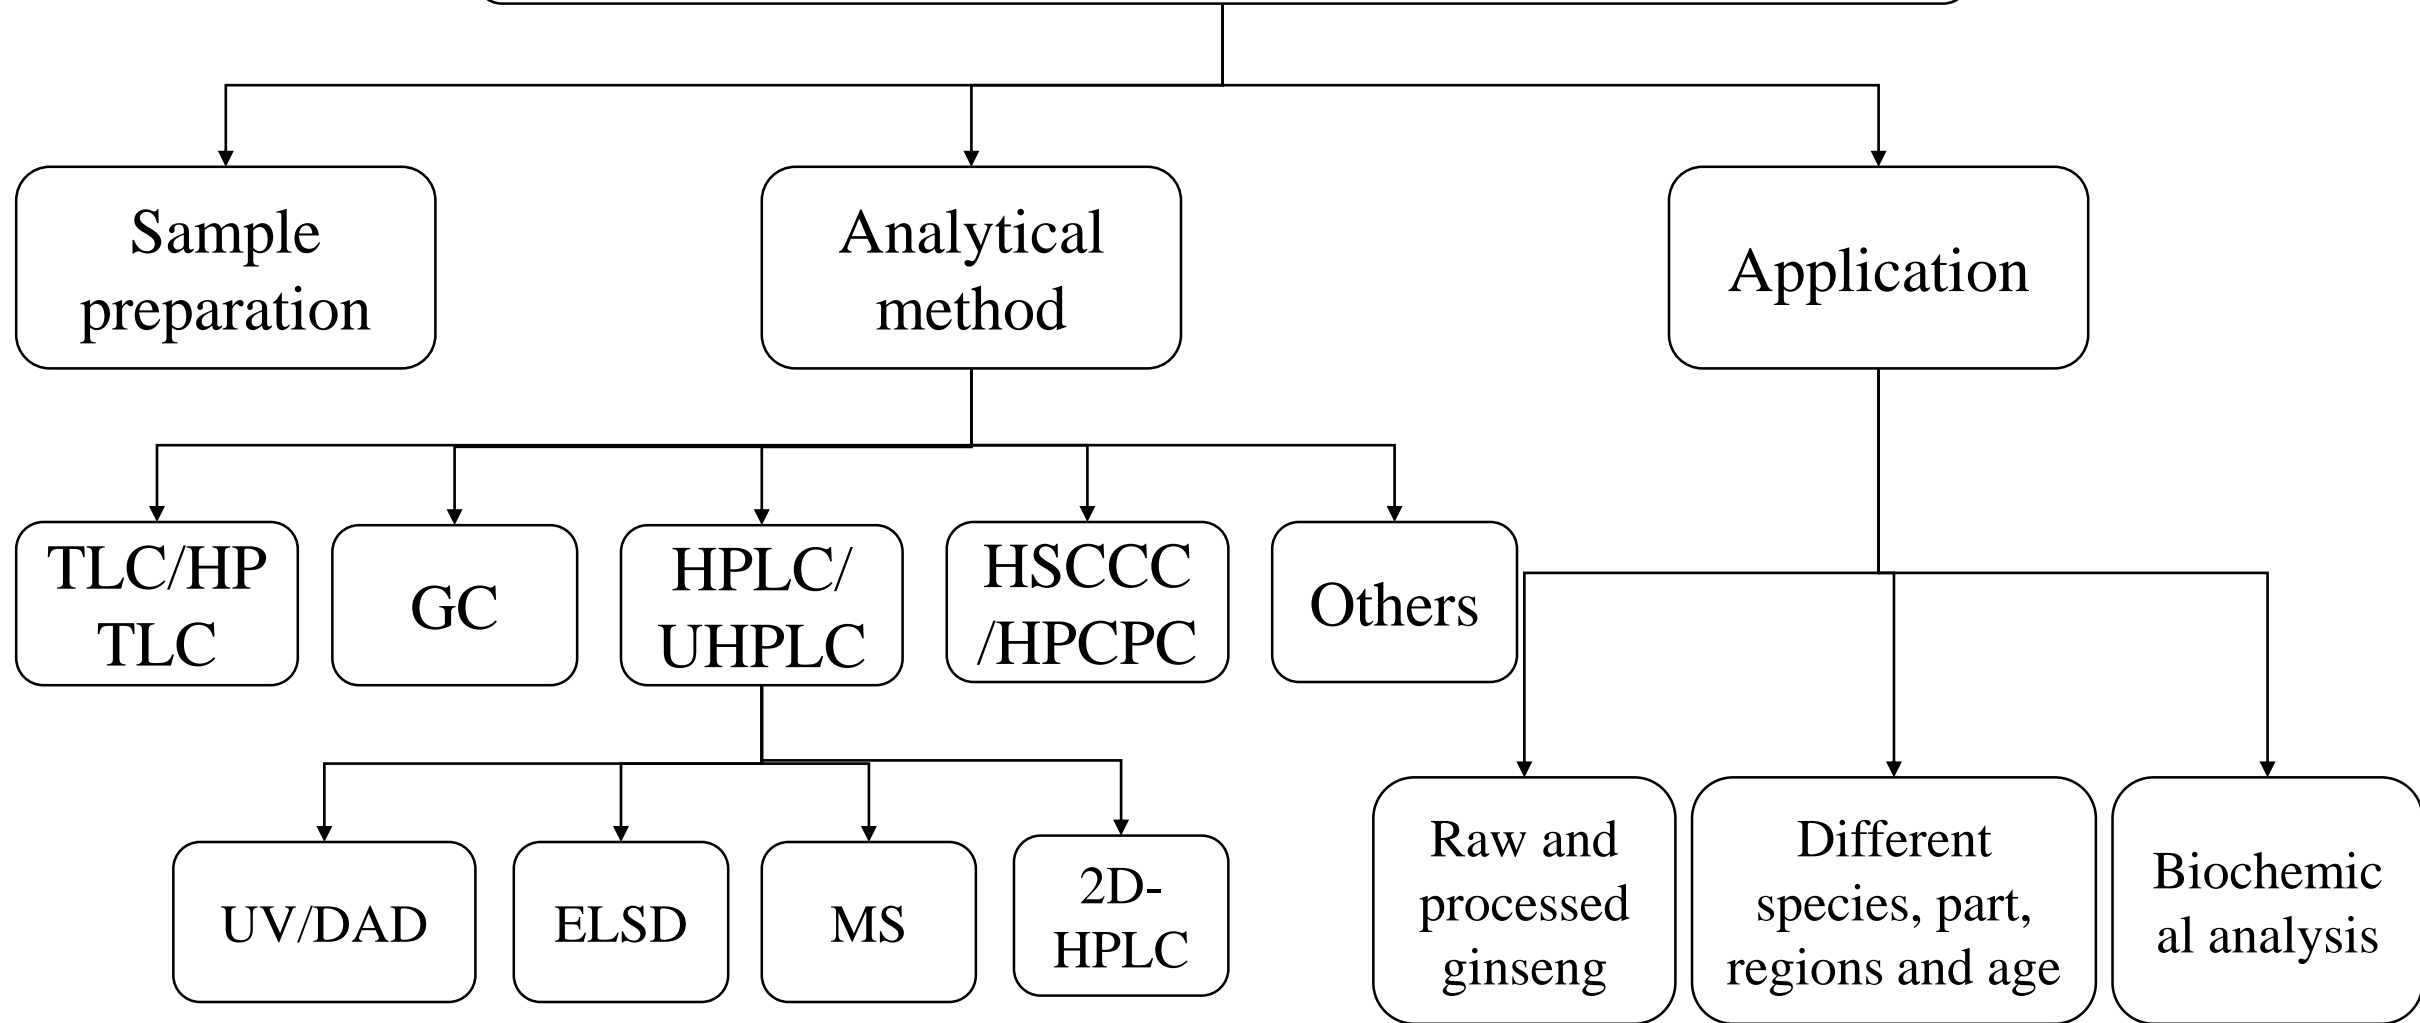

Supplement: mmc1.pdf [file mmc1.pdf]
